# Supplementary material
Source: PubMed Central journal article supplement (PMC3522772)
Supplement: NIHMS416431-supplement-1.pdf [file NIHMS416431-supplement-1.pdf]

## SUPPLEMENTARY INFORMATION

### **Trex1 regulates lysosomal biogenesis and interferon-independent activation of antiviral genes**

Maroof Hasan, James Koch, Dinesh Rakheja, Asit K. Pattnaik, James Brugarolas, Igor Dozmorov, Beth Levine, Edward K. Wakeland, Min Ae Lee-kirsch and Nan Yan

Correspondence should be addressed to N.Y. ([nan.yan@utsouthwestern.edu](mailto:nan.yan@utsouthwestern.edu))

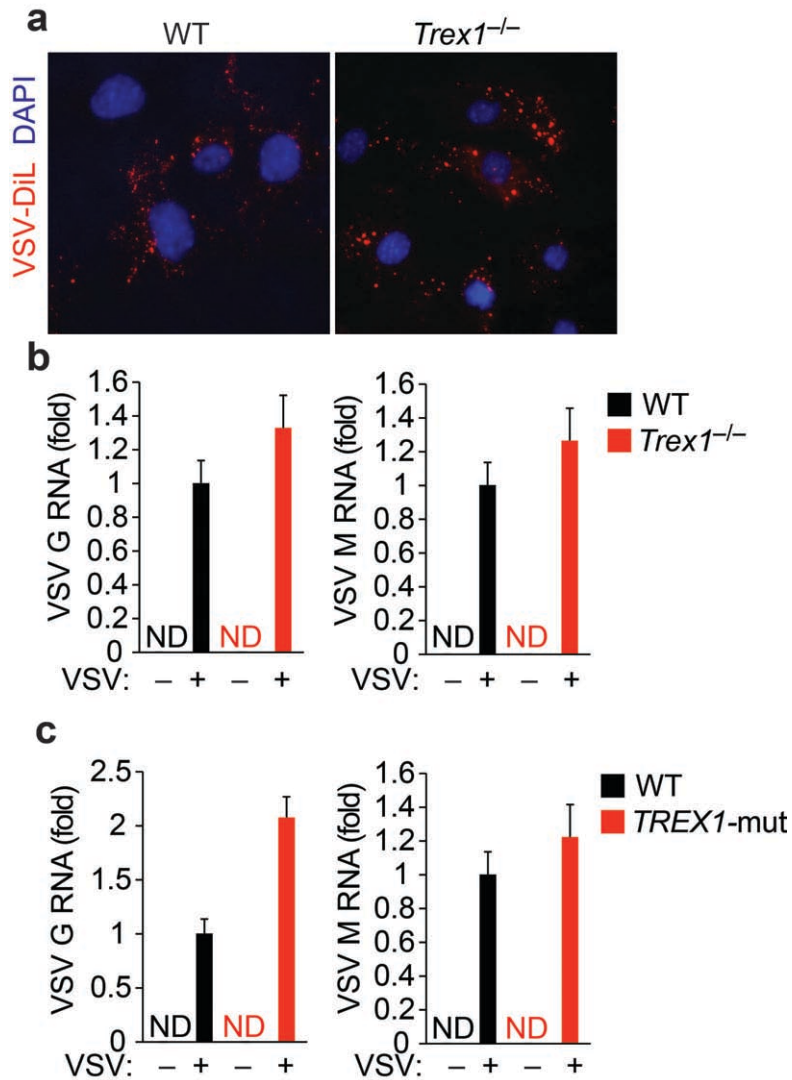

**Supplementary Figure 1.** VSV entry is not affected by *Trex1*-deficiency or *TREX1* mutation. (a) Fluorescent microscopy of WT and *Trex1*<sup>-/-</sup> MEFs infected with VSV-DiL (red, fluorescently labeled virion) for 1 h. Representative images from 3 independent experiments are shown. (b,c) Quantitative RT-PCR analysis of VSV G and M RNA in WT and *Trex1*<sup>-/-</sup> MEFs (b) or WT and *TREX1*<sup>R114H/R114H</sup> (*TREX1*-mut) human fibroblasts (c) infected with VSV at MOI of 2 for 1 h. WT normalized to 1. ND, not detectable. Data are representative of two independent experiments (error bars, s.d.).

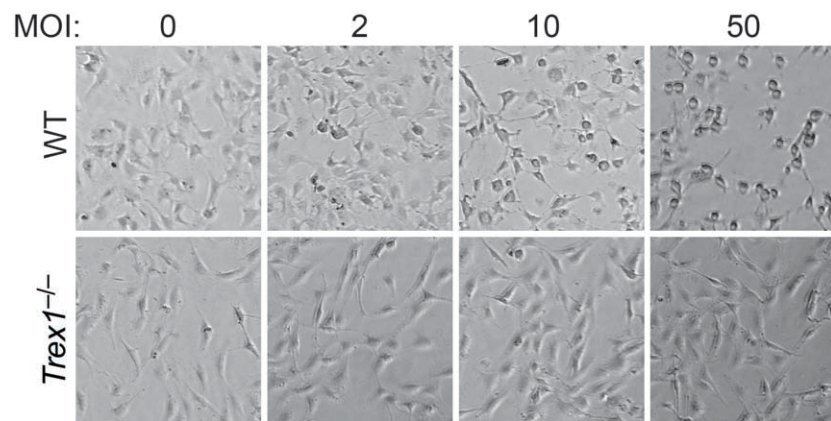

**Supplementary Figure 2.** VSV infection caused cytopathic effect in WT, but not *Trex1*<sup>-/-</sup>, MEFs. WT and *Trex1*<sup>-/-</sup> MEFs were infected with VSV at MOI indicated on top for 18 h. Phase contrast images were taken without fixing the cells. Representative images from three independent experiments are shown.

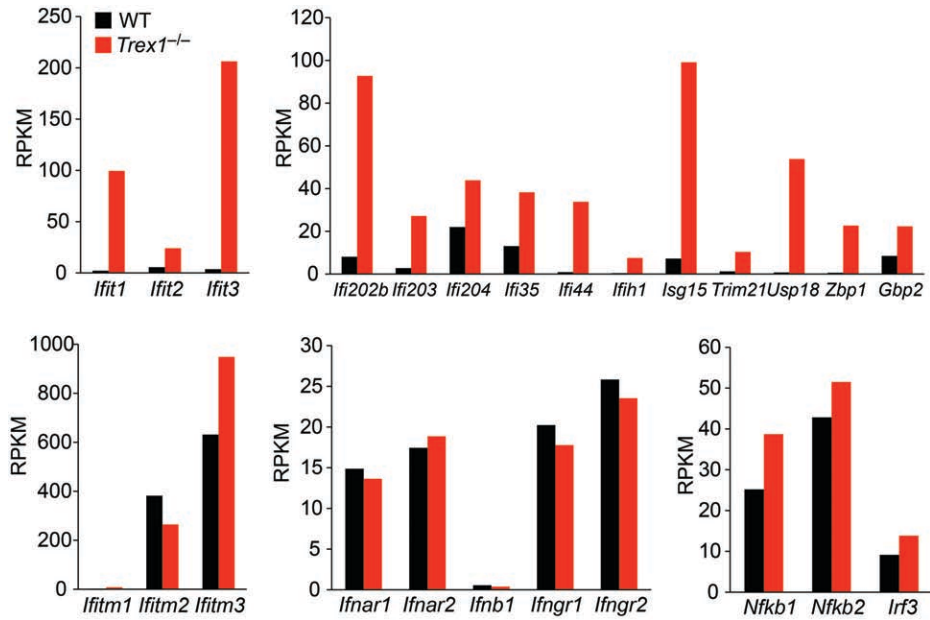

**Supplementary Figure 3.** Selected host gene expression from RNA-SEQ analysis in Fig. 3a. RPKM, Reads Per Kilobase of exon model per Million mapped reads, indicates expression value of each gene.

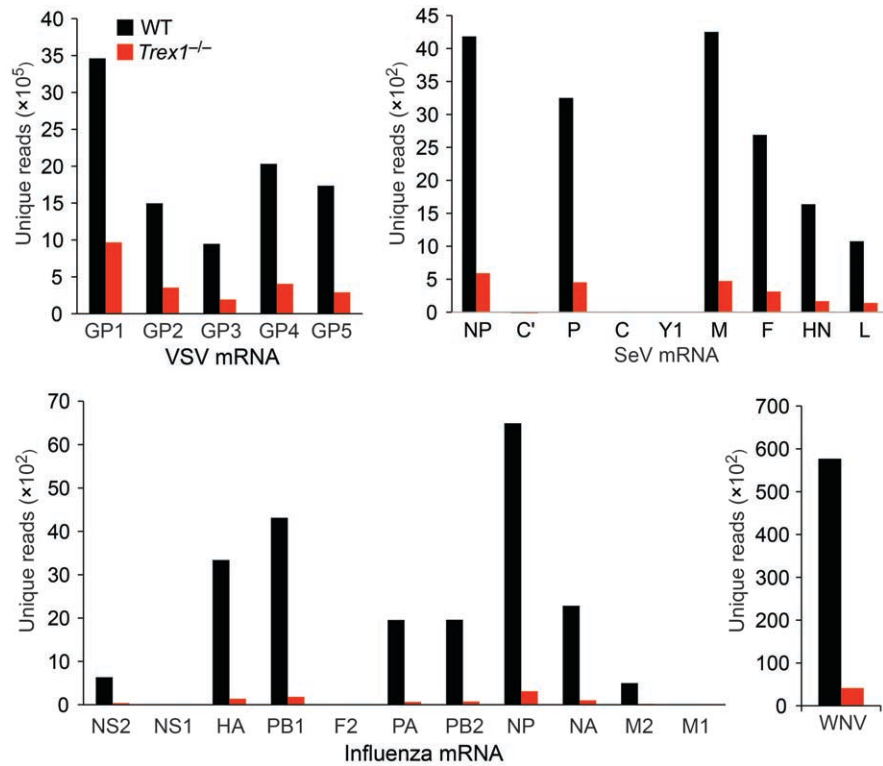

**Supplementary Figure 4.** Selected viral gene expression from RNA-SEQ analysis in Fig. 3a. Viral mRNAs that are not polyadenylated or do not contain A rich sequences will not be detected by RNA-SEQ, due to a preparation step that involves poly-dT selection.

**a**

| Rank | Network function                                                                                 | Score | Molecules in network                                                                                                                                                                                                                                         |
|------|--------------------------------------------------------------------------------------------------|-------|--------------------------------------------------------------------------------------------------------------------------------------------------------------------------------------------------------------------------------------------------------------|
| 1    | Antimicrobial Response, Inflammatory Response, Infectious Disease                                | 40    | ADAR, ATP6V1B1, CH25H, CTSF, CXCL16, Ifitm1, GBP2, IFI27, IFI35, IFI44, Ifi47, Ifi204, IFI27L2, IFIH1, IFIT1, IFIT2, IFIT1B, Ifitm7, IRF6, IRF1, IRG, ISG15, NFKBIA, NMI, PARP9, PCDH7, PLD3, RNASE4, SP110, SUMO3, TNFSF10, TNIP3, WBP5, ZBP1               |
| 2    | Genetic Disorder, Neurological Disease, Psychological Disorders                                  | 38    | ADRA1D, BAI2, CD97, CELSR2, CYSLTR1, DRD4, F2RL3, FZD1, FZD3, FZD6, FZD7, FZD9, Gpcr, GPR44, GPR56, GPR61, GPR75, GPR88, GPR97, GPR115, GPR124, GPR132, GPR133, GPR157, GPR162, GPR176, GPR137B, GPRC5C, HRH2, HTR6, KISS1R, NPY1R, OPR11, Piik3r            |
| 3    | Cellular Movement, Connective Tissue Development and Function, Cellular Function and Maintenance | 36    | AASS, AChR, Actg2, AGRN, C13orf15, CPXM1, DFNA5, DNAH2, Ecm, ECM2, GALM, GPD5, GYLTL1B, H1FX, LOXL2, Masp1, MFAP2, NOV, OVOL1, PDK2, PDZK1IP1, PHKG1, phosphorylase, PLA1A, RAB9A, RAMP2, ROBO3, SERPINB10, SPAG4, S, PARCL1, STARD10, TGFB3, TGFB1, TYMP    |
| 4    | Amino Acid Metabolism, Energy Production, Post-Translational Modification                        | 36    | AIFM3, ARNT2, BIRC3, CASQ1, CD53, FAM43A, IFI44L, Ifng, IKK, IMPACT, L1CAM, MALT1, MDM4, NLRP2, NPAS1, PEA15, PEK, PKP3, PSEN2, RALGPS2, RHPN2, Rpl29, RPS8KA1, Serpina3k, SFN, SGK223, SHROOM1, SOX7, Sp100, ST5, Tnf, UACA, XAF1, Zfp108/Zfp93             |
| 5    | Drug Metabolism, Lipid Metabolism, Small Molecule Biochemistry                                   | 34    | ARSG, ARSI, ARSK, Cml5, CYP1A1, Cyp1a, CYP27A1, CYP2C18, CYP2D6, CYP2F1, Cyp2j9, CYP3A4, CYP7B1, FMO5, GAB1, GTPASE, NAALAD2, PRPH, PTPLAD1, RASA4/RASA4B, RBFOX1, RGS16, RGS17, RORA, Shank2, SIDT2, SLC46A3, ST3GAL4, TSC2D21, UGT, UGT1A6, Ugt1a7c, VEPH1 |

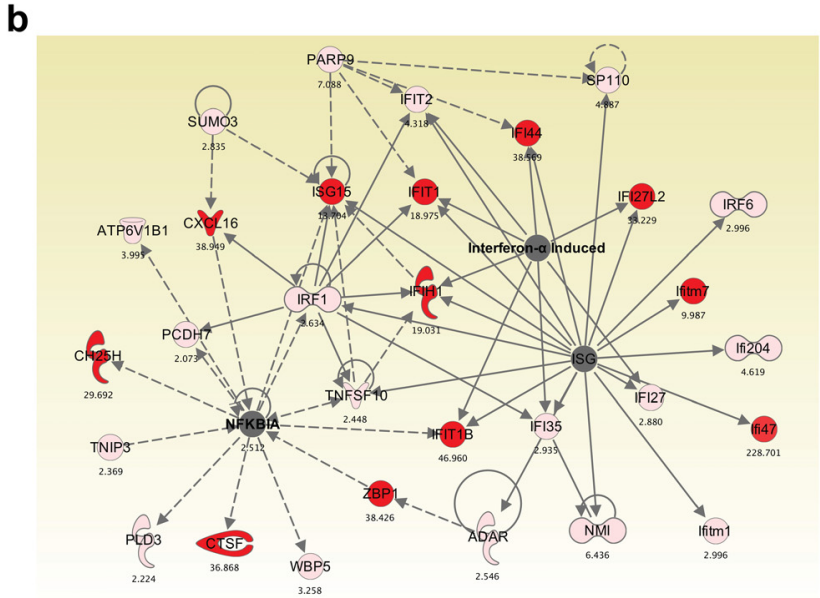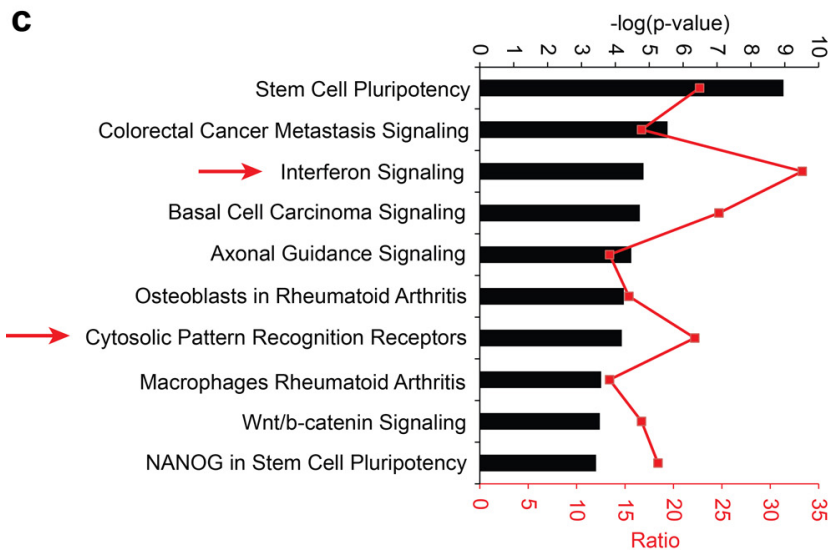

**Supplementary Figure 5.** Ingenuity pathway analysis of genes up-regulated in *Trex1*<sup>-/-</sup> cells. Gene expression data from RNA-SEQ were analyzed by Ingenuity Pathway Analysis (IPA) software package. **(a)** Top five ranked gene networks. **(b)** Detailed view of the most enriched gene network (#1 in **a**). Numbers below each molecule represent fold up-regulation in *Trex1*<sup>-/-</sup> cells compared to WT cells. Molecules in red were up-regulated more than 10-fold. **(c)** Top ten ranked canonical pathways. Black bars show the *p*-value of each pathway. Red line represents percentage of genes (Ratio) within each pathway that were up-regulated in *Trex1*<sup>-/-</sup> dataset. Red arrows highlight two innate immune pathways that are up-regulated in *Trex1*<sup>-/-</sup> cells and have high ratio of hits.

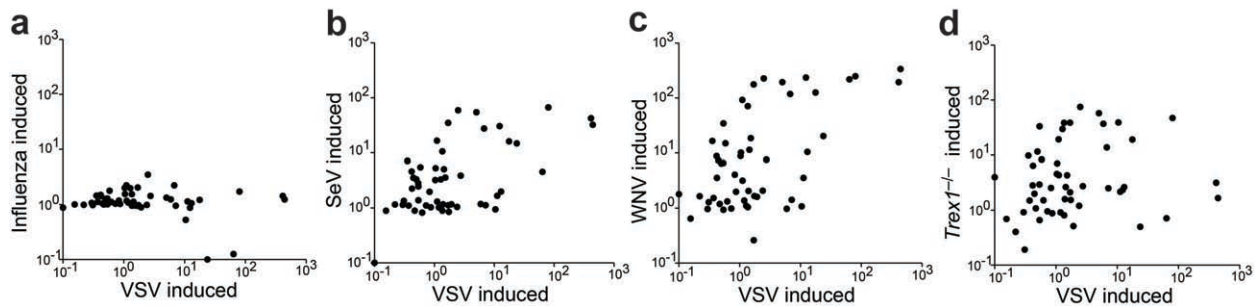

**Supplementary Figure 6.** ISG induction signature in infected WT cells (a-c) and uninfected *Trex1*<sup>-/-</sup> cells (d). Each dot represents a gene from **Fig. 3a**: the x-axis value is fold-increase after VSV infection in WT MEFs, and the y-axis value is fold-increase after influenza (**a**), Sendai (**b**) or West Nile virus (**c**) infection in WT MEFs as indicated on the y axis, or fold-increase in uninfected *Trex1*<sup>-/-</sup> MEFs (**d**). All compared to uninfected WT MEFs.

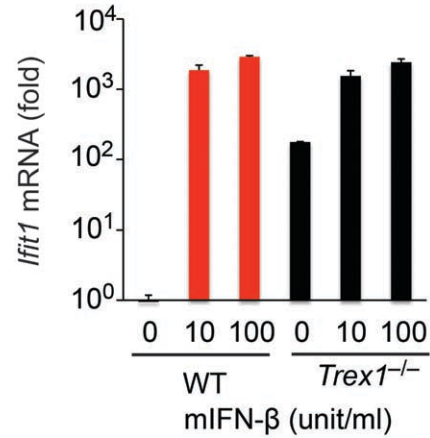

**Supplementary Figure 7.** IFN-β induces *Ifit1* expression in WT and *Trex1*<sup>-/-</sup> MEFs. WT and *Trex1*<sup>-/-</sup> MEFs were treated with recombinant mIFN-β at indicated dose for 6 h. *Ifit1* mRNA level was measured by qRT-PCR. Untreated WT sample was normalized to 1. Data are representative of two independent experiments (error bars, s.d.).

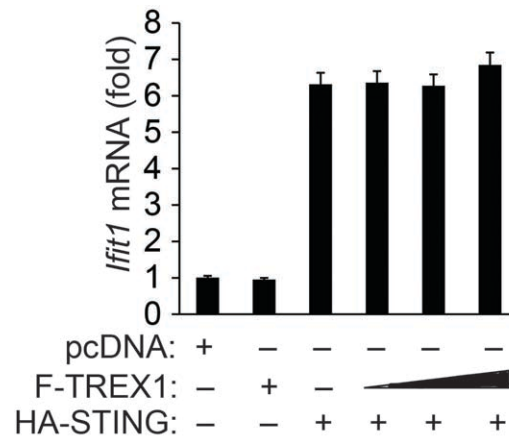

**Supplementary Figure 8.** *Trex1* does not directly inhibit STING-mediated activation of *Ifit1* in 293T cells. 293T cells were transfected with plasmids expression Flag-TREX1 or HA-STING as indicated. Twenty-four hours after transfection, *Ifit1* mRNA was measured by qRT-PCR. pcDNA transfected sample was normalized to 1. Data are representative of three independent experiments (error bars, s.d.).

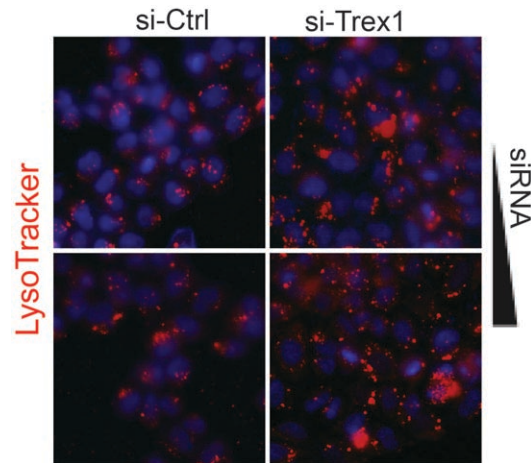

**Supplementary Figure 9.** Trex1 knockdown in HeLa cells induces lysosomes. HeLa cells were transfected with Ctrl or Trex1 siRNA for 72 h and stained with LysoTracker Red. Two doses of siRNA were used, 20 pmole and 40 pmole. Representative images from three independent experiments are shown.

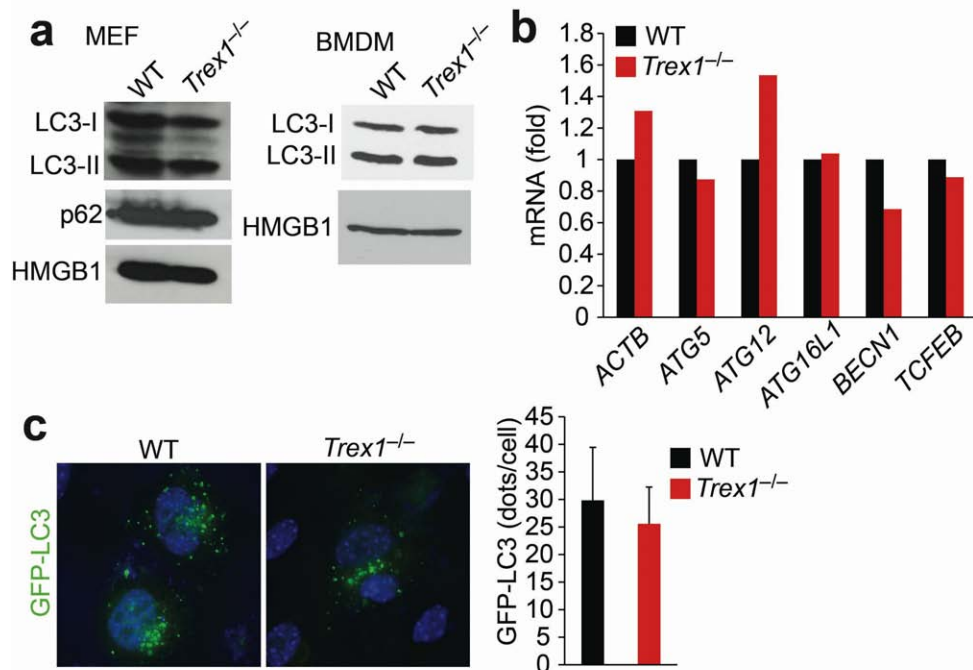

**Supplementary Figure 10.** Autophagosome formation in WT and *Trex1*<sup>-/-</sup> cells. (a) Western blot analysis of endogenous LC3, p62 proteins in WT and *Trex1*<sup>-/-</sup> MEFs and BMDMs. HMGB1 serves as loading controls. Representative blots from three independent experiments are shown. (b) Control (*ACTB*) and autophagy-related gene expression values determined by RNA-SEQ (Fig. 3). WT values were normalized to 1. (c) Fluorescence microscopy analysis of GFP-LC3 dot formation in WT and *Trex1*<sup>-/-</sup> MEFs. Cells grown on slides were transfected with GFP-LC3 plasmids and fixed 24 h post transfection. Numbers of GFP-LC3 dot per cell are shown on the right. Averages of 12 cells are shown (error bars. s.d.).



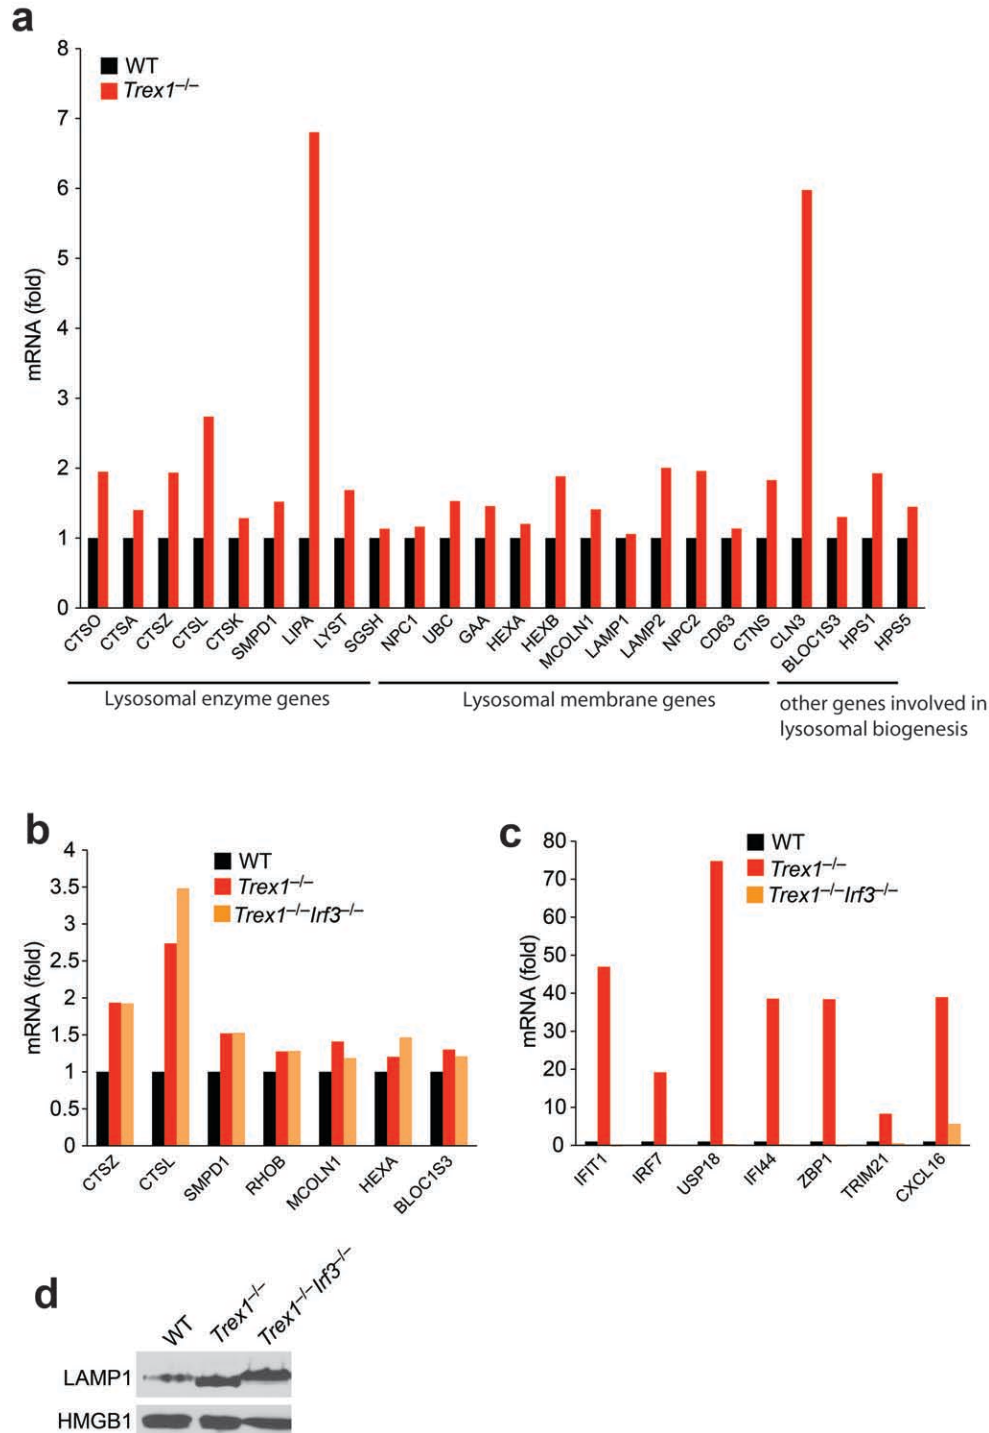

**Supplementary Figure 11.** Genes related to lysosomal biogenesis are up-regulated in *Trex1*<sup>-/-</sup> cells. Gene expression values were determined by RNA-SEQ as in **Fig. 3**. WT values were normalized to 1. **(a)** lysosomal gene expression values comparing WT and *Trex1*<sup>-/-</sup>. **(b-c)** lysosomal gene **(b)** or ISGs **(c)** expression values comparing WT, *Trex1*<sup>-/-</sup> and *Trex1*<sup>-/-</sup>*Irf3*<sup>-/-</sup>. **(d)** Western blot analysis of LAMP1 protein level in WT, *Trex1*<sup>-/-</sup> and *Trex1*<sup>-/-</sup>*Irf3*<sup>-/-</sup> MEFs. A representative blot from three independent experiments is shown.

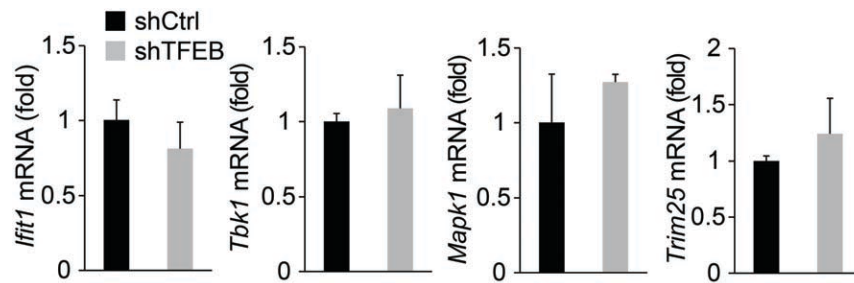

**Supplementary Figure 12.** TFEB knockdown does not affect innate immune gene expression. MEFs stably expressing shCtrl or shTFEB were used for qRT-PCR analysis of indicated genes. Data are representative of three independent experiments (error bars, s.d.).

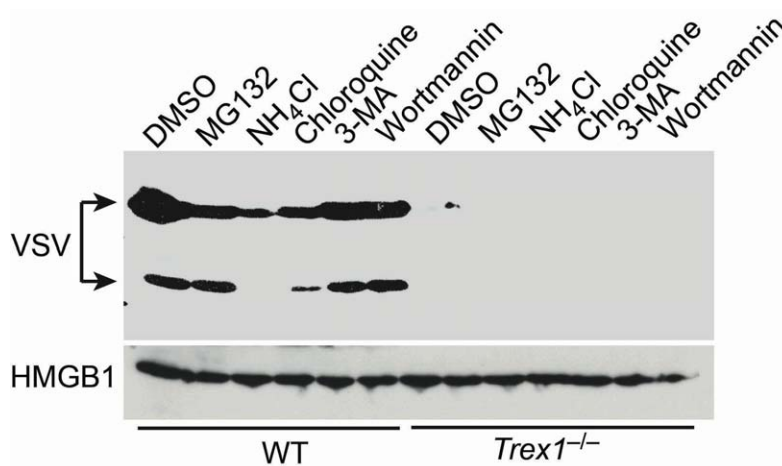

**Supplementary Figure 13.** Effects of various inhibitors on VSV replication in WT and *Trex1*<sup>-/-</sup> cells. Western blot analysis of VSV proteins in WT and *Trex1*<sup>-/-</sup> MEFs treated with indicated drugs for 1 h and infected with VSV for 24 h. MG132 was used at 2.5 uM, NH<sub>4</sub>Cl at 20 mM, chloroquine at 50 uM, 3-MA at 1mM, wortmannin at 10 uM. A representative blot from two independent experiments is shown.

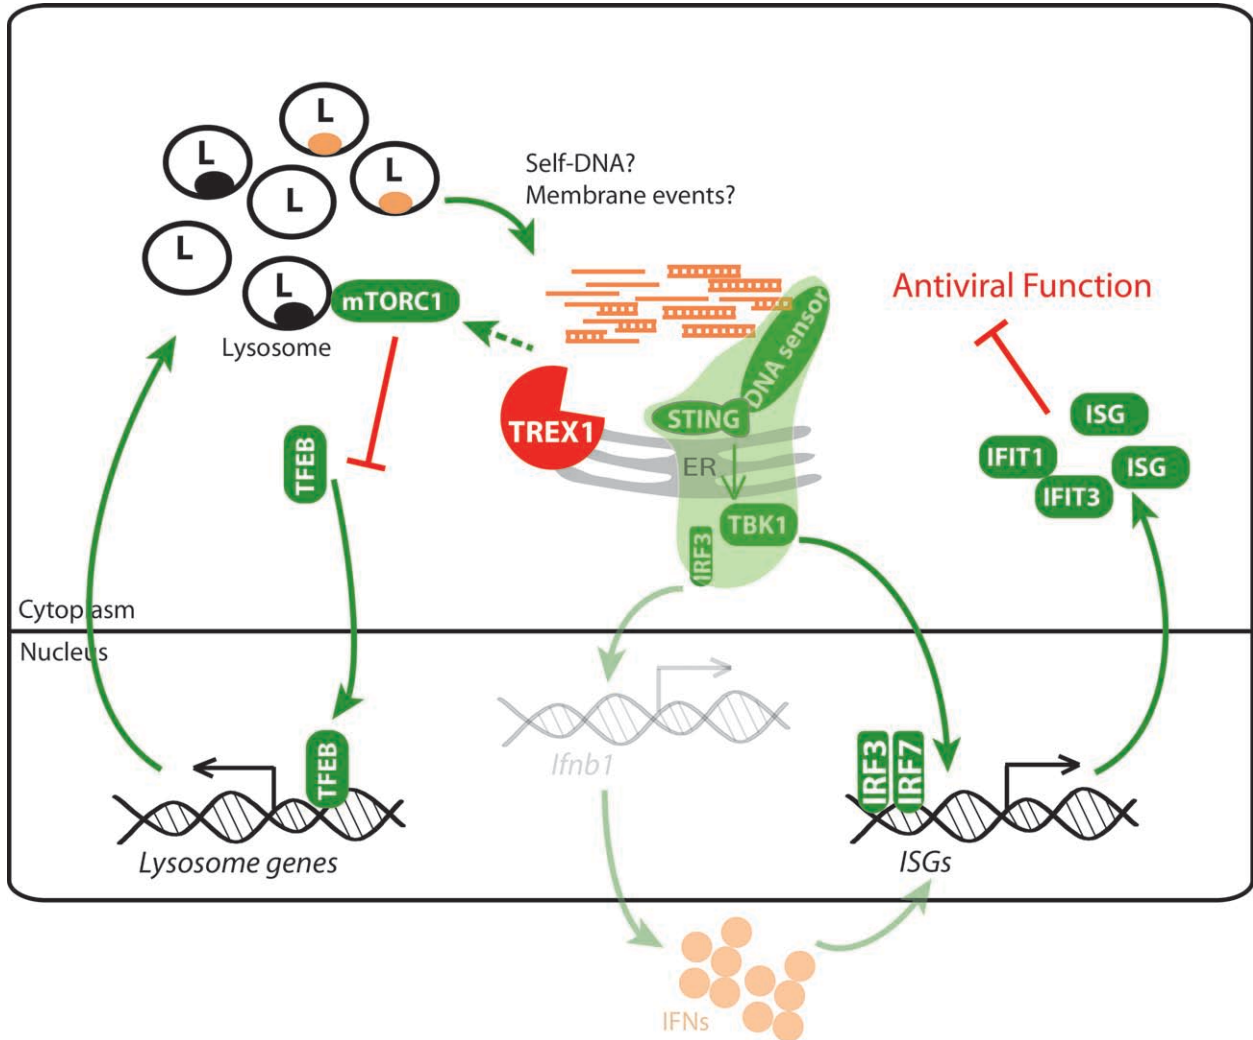

**Supplementary Figure 14.** A model showing how TREX1 regulates lysosomal biogenesis and IFN-independent activation of antiviral genes.

**Supplementary Table 1.** DNA oligos used in this study. All oligos were purchased from Sigma.

| <b>Oligo name</b>    | <b>Forward and reverse oligo sequence</b>                |
|----------------------|----------------------------------------------------------|
| Mouse <i>Gapdh</i>   | TTCACCACCATGGAGAAGGC,<br>GGCATCGACTGTGGTCATGA            |
| Mouse <i>Ifnb</i>    | CTGCGTTCCTGCTGTGCTTCTCCA,<br>TTCTCCGTCATCTCCATAGGGATC    |
| VSV <i>G</i>         | CAAGTCAAAATGCCCAAGAGTCACA,<br>TTTCCTTGCATTGTTCTACAGATGG  |
| VSV <i>M</i>         | TATGATCCGAATCAATTAAGATATG,<br>GGGACGTTTCCCTGCCATTCCGATG  |
| Influenza <i>NS1</i> | TCGAGACAGCCACACGTGCTGGAAA,<br>AAGAGGGCCTGCCACTTTCTGCTTG  |
| SeV <i>P</i>         | TGTTATCGGATTCCTCGACGCAGTC,<br>TACTCTCCTCACCTGATCGATTATC  |
| WNV <i>Env</i>       | TCACGCATCTCTCCACCAAAG,<br>GGGTCAGCACGTTTGTTCATTG         |
| Mouse <i>Ifit1</i>   | GAACCCATTGGGGATGCACAACCT,<br>CTTGTCCAGGTAGATCTGGGCTTCT   |
| Mouse <i>Ifit2</i>   | ATGAGTTTCAGAACAGTGAGTTTAA,<br>AACTGGCCCATGTGATAGTAGACCC  |
| Mouse <i>Ifit3</i>   | TGGCCTACATAAAGCACCTAGATGG,<br>CGCAAACCTTTTGGCAAACCTTGTCT |
| Mouse <i>Irf7</i>    | ATGCACAGATCTTCAAGGCCTGGGC,<br>GTGCTGTGGAGTGCACAGCGGAAGT  |
| Mouse <i>Ifitm3</i>  | GAGGTGGCTGAGATGGGGGCACCG,<br>CTCCAGTCACATCACCCACCATCTT   |
| Mouse <i>Stat1</i>   | AAGGTGAAGCCAATGGTGTGGCGAA,<br>CCGATGCAGGCGCTCTGCTGCCTTC  |
| Mouse <i>Stat2</i>   | ACAGGATGTCTTCAGCTTCAGATAC,<br>CACTCGTCCAGCTTGGGCAGCAATA  |
| Mouse <i>Ifna4</i>   | CTTTCCTCATGATCCTGGTAATGAT,<br>AATCCAAAATCCTTCTGTCCTTC    |
| Mouse <i>Ctsa</i>    | GACTCCAAGCACTTCCACTACTGGT,<br>CTGGCTGGATCAGAAAGGGGCCGTG  |
| Mouse <i>Sgsh</i>    | CCCTGTCCC GCCACAGCCTTATCTT,<br>GAGTTGAAGTGATGCACATCCTGGT |
| Mouse <i>Lamp1</i>   | TAATGGCCAGCTTCTCTGCCTCCTT,<br>AGGCTGGGGTCAGAAACATTTTCTT  |
| Mouse <i>Mcoln1</i>  | CCCACAGAAGAGGAAGACCTCCGCC,<br>AGAGAATGAGCTGCACAGTGACCAC  |
| Mouse <i>Tpp1</i>    | GCTGGGTGTCCCTGGGCCGCGTGGA,<br>AGGGTTAGGTACTTTCCATATTGAG  |
| Mouse <i>Tcfef</i>   | GAGCTAACAGATGCTGAGAGCAGAGC,<br>GCATCCTCCGGATGTAATCCACAGA |

|                     |                                                         |
|---------------------|---------------------------------------------------------|
| Mouse <i>Tbk1</i>   | CCAGTGGATGTTCAAATGAGAGAAT,<br>TCTAGAACAGTGTATAAACTCCCAC |
| Mouse <i>Mapk1</i>  | CTGCTTATGATAATCTCAACAAAGT,<br>TGCCCGGATGATGTCATTGATGCCA |
| Mouse <i>Trim25</i> | AATGTCGCAAAGTGTACCAGGTGCG,<br>ACGAGGCACGTCTTCACTGCGATCT |

**Supplementary Table 2.** siRNA oligos used in this study. All oligos were purchased from Sigma.

| <b>Oligo name</b> | <b>Sequence</b>                                                  |
|-------------------|------------------------------------------------------------------|
| Control           | UAGCGACUAAACACAUCAA                                              |
| Trex1             | GCUACAGCCUGGGCAGCAU, CAGGGAAUGGUUCGAGGAA,<br>CACACAACGGUGACCGCUA |
| IFIT1             | GAAAUGAACCCUGCAUUCU, CAACAAAUCUCCCAACUGA                         |
| IFITM3            | CACGGAUCGGCUUCUGUCA, GCACCUUGGUCCUCAGCAU                         |
| STAT1             | CUCAGAACACUCUGAUUAA, CACAGUAUAAACACGAAUU                         |
| STAT2             | GAAUCAGGCUCAAAGAGCU, GUGAUUAUUUCUACAUGA                          |
| IRF3              | CAAGGUUGUCCUACAUGU, GUCCUCAGAUCUGGCUAUU                          |
| IRF7              | GGAAAUUGCCCUCGAUGUU, CACCUAUUUACUAGAGCU                          |
| TFEB              | CAACAGUCCCAUGGCAUG, CCAACCUGUCCAAGAAGGA                          |
| TBK1              | CGGAAGAGUGGAUGAGAAA                                              |
| STING             | UCAAUCAGCUACAUAACAA                                              |
| IFI204            | UUAGUUUACUGCCUGGUUC                                              |
| RIG-I             | CAAGAAGAGUACCACUAA                                               |
| MAVS              | GAUCAAGUGACUCGAGUUU                                              |
| mTOR              | GGAUCAACCACCAGCGCUA, CUGACUACGCCUCCCGCAU                         |
